# Supplementary material
Source: PubMed Central journal article supplement (PMC1166601)

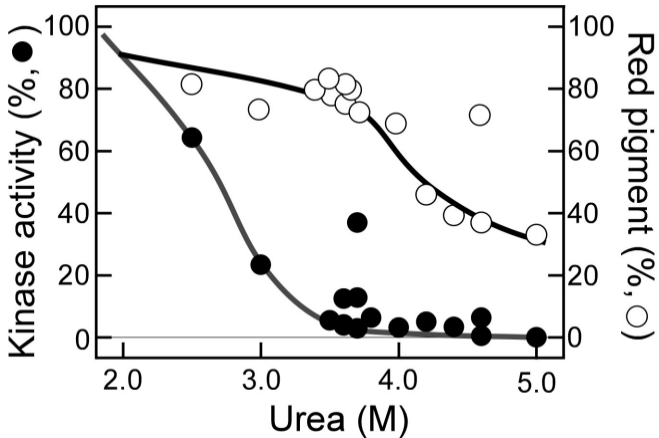

Supplement: pnas_0501875102_1.pdf [file pnas_0501875102_1.pdf]

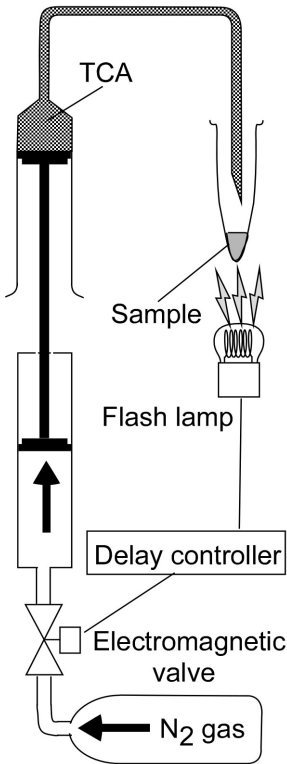

Supplement: pnas_0501875102_2.pdf [file pnas_0501875102_2.pdf]
